# Supplementary material for: Valorization of Polysaccharides Obtained from Dark Tea: Preparation, Physicochemical, Antioxidant, and Hypoglycemic Properties
Source: MDPI journal article supplement (doi:10.3390/foods10102276), 2021-09-26
Supplement: s1 [file s1]

**Table S1.** CCD design factors and levels of response surface in the extraction process.

| Factors                        | Levels |      |      |
|--------------------------------|--------|------|------|
|                                | -1     | 0    | 1    |
| A. Solid-liquid ratio (g/mL)   | 1:10   | 1:15 | 1:20 |
| B. Extraction time (h)         | 1.5    | 2    | 2.5  |
| C. Extraction temperature (°C) | 80     | 90   | 100  |

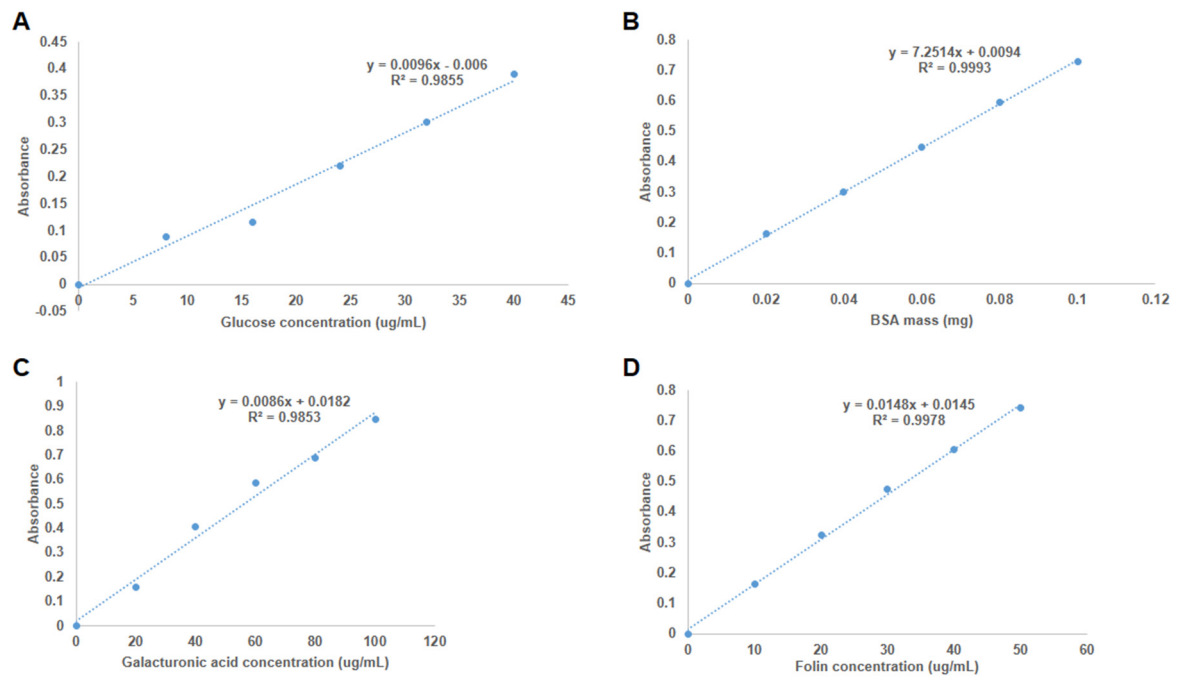**Figure S2.** Standard curves of glucose (A), bovine serum albumin (B), galacturonic acid (C) and folin (D).**Table S3.** Three-factor, three-level CCD design for crude polysaccharide extraction method optimization and the investigated response for experimental results.

| Run No. | A     | B     | C     | Polysaccharide yield (%) |
|---------|-------|-------|-------|--------------------------|
|         | $X_1$ | $X_2$ | $X_3$ |                          |
| 1       | -1    | 0     | 1     | 4.0                      |
| 2       | 0     | -1    | 1     | 6.4                      |
| 3       | -1    | 1     | 0     | 1.4                      |

|    |    |    |    |     |
|----|----|----|----|-----|
| 4  | 0  | 1  | 1  | 5.8 |
| 5  | 1  | 0  | 1  | 5.8 |
| 6  | 0  | 0  | 0  | 5.4 |
| 7  | 1  | 1  | 0  | 4.4 |
| 8  | 0  | 0  | 0  | 6.0 |
| 9  | 0  | 0  | 0  | 6.1 |
| 10 | 0  | 0  | 0  | 6.0 |
| 11 | 0  | -1 | -1 | 7.4 |
| 12 | -1 | -1 | 0  | 4.8 |
| 13 | -1 | 0  | -1 | 3.4 |
| 14 | 0  | 1  | -1 | 3.2 |
| 15 | 1  | 0  | -1 | 5.8 |
| 16 | 1  | -1 | 0  | 4.8 |
| 17 | 0  | 0  | 0  | 6.1 |

**Table S4.** ANOVA for response surface quadratic model.

| Source                        | Sun of Squares | df | Mean Square | F value | P value | Significance <sup>a</sup> |
|-------------------------------|----------------|----|-------------|---------|---------|---------------------------|
| Model                         | 31.57          | 9  | 3.51        | 37.10   | <0.0001 | **                        |
| X <sub>1</sub>                | 6.48           | 1  | 6.48        | 68.52   | <0.0001 | **                        |
| X <sub>2</sub>                | 9.24           | 1  | 9.24        | 97.76   | <0.0001 | **                        |
| X <sub>3</sub>                | 0.61           | 1  | 0.61        | 6.40    | 0.0393  | *                         |
| X <sub>1</sub> X <sub>2</sub> | 2.25           | 1  | 2.25        | 23.79   | 0.0018  | **                        |
| X <sub>1</sub> X <sub>3</sub> | 0.09           | 1  | 0.09        | 0.95    | 0.3618  |                           |
| X <sub>2</sub> X <sub>3</sub> | 3.24           | 1  | 3.24        | 34.26   | 0.0006  | **                        |
| X <sub>1</sub> <sup>2</sup>   | 8.02           | 1  | 8.02        | 84.79   | <0.0001 | **                        |
| X <sub>2</sub> <sup>2</sup>   | 0.78           | 1  | 0.78        | 8.23    | 0.0240  | *                         |
| X <sub>3</sub> <sup>2</sup>   | 0.93           | 1  | 0.93        | 9.83    | 0.0165  | *                         |
| Residual                      | 0.66           | 7  | 0.95        |         |         |                           |
| Lack of Fit                   | 0.43           | 3  | 0.14        | 2.47    | 0.2013  |                           |

|               |        |    |       |
|---------------|--------|----|-------|
| Pure Error    | 0.23   | 4  | 0.058 |
| Cor Total     | 32.24  | 16 |       |
| R-Squared     | 0.9795 |    |       |
| Adj R-Squared | 0.9531 |    |       |

<sup>a</sup> Significance: \* $p < 0.05$ , \*\* $p < 0.01$ .

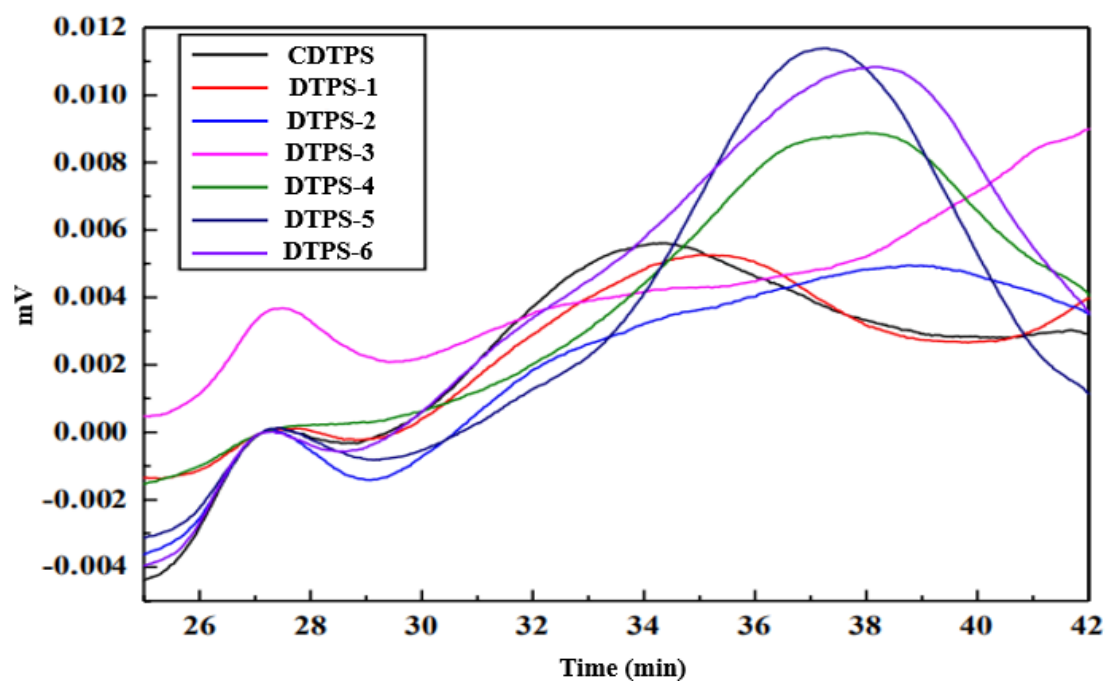

**Figure S5.** SEC profiles of DTPSs on high performance liquid gel permeation chromatography.

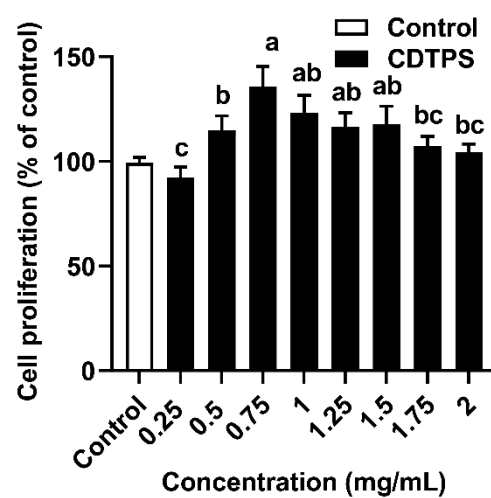

**Figure S6.** Cell proliferation of different concentrations of CDTPS.
